# Supplementary material for: Novel Ampeloviruses Infecting Cassava in Central Africa and the South-West Indian Ocean Islands
Source: MDPI journal article supplement (doi:10.3390/v13061030), 2021-05-29
Supplement: s1 [file s1]

**Table S1:** Length of ORF and molecular mass of 3 encoded proteins (RdRp, HSP70h and CP) of the 15 isolates of the cassava ampelovirus reported in this study.

| Species       | Isolates    | Genome Length (nt) | Length of ORFs for predicted proteins (nt)/Molecular Mass of encoded proteins (kDa) |            |          |
|---------------|-------------|--------------------|-------------------------------------------------------------------------------------|------------|----------|
|               |             |                    | RdRp                                                                                | HSP70h     | CP       |
| <b>MeaV-1</b> | MG-Men-241  | 13,528             | 1,521/57.4                                                                          | 1,707/62.1 | 774/27.8 |
|               | RE-LJV      | 13,640             | 1,521/57.3                                                                          | 1,707/62.7 | 774/27.7 |
|               | MG-Mia-403  | na                 | 1,653/60                                                                            | 1,671/58.6 | na       |
|               | MY-6mb-4    | 13,615             | 1,500/56.5                                                                          | 1,707/60.6 | 774/26.9 |
|               | CG-Nmb      | 13,612             | 1,503/56.6                                                                          | 1,707/62.2 | 774/27.7 |
|               | CG-Kah      | 13,616             | 1,521/57.4                                                                          | 1,707/61.7 | 774/27.7 |
|               | MY-Reu-5    | 13,636             | 1,614 <sup>a</sup> /57.8                                                            | 1,707/62.3 | 768/27.6 |
| <b>MeaV-2</b> | MG-Mian-2-2 | na                 | 16,53/60.3                                                                          | 16,71/58.2 | na       |
|               | MG-Men-9    | 13,752             | 15,93/60.4                                                                          | 16,08/58.5 | 816/27.9 |
|               | MG-Mia-10   | 13,770             | 15,93/60.3                                                                          | 16,08/58.5 | 816/27.9 |
|               | MY-6mb-6    | 13,764             | 15,54/42.3                                                                          | 16,08/58.4 | 816/27.9 |
|               | MY-Reu-8    | na                 | 15,93/49.3                                                                          | 16,08/55.8 | na       |
|               | MG-Mia-362  | 12,007             | 15,93/60.3                                                                          | 16,08/58.4 | 768/27.7 |

na: information not available as the contig/scaffold does not extend to the region concerned.

<sup>a</sup>: The ORF is whether truncated or has gaps.
