# Supplementary material for: Novel Ampeloviruses Infecting Cassava in Central Africa and the South-West Indian Ocean Islands
Source: MDPI journal article supplement (doi:10.3390/v13061030), 2021-05-29
Supplement: s1 [file s1]

**Table S2:** Accession numbers and abbreviations for selected closterovirus used in the phylogenetic reconstruction of the HSP70h nucleotide sequences.

| Genus                       | Species Names                                        | Assigned abbreviation | Sequence accession N° (GenBank) |
|-----------------------------|------------------------------------------------------|-----------------------|---------------------------------|
| <b><i>Closterovirus</i></b> | beet yellow stunt virus                              | (BYSV)                | [BYU51931]                      |
|                             | beet yellow virus                                    | (BYV)                 | [NC_001598]                     |
|                             | Citrus tristeza Virus                                | (CTV)                 | [NC_001661]                     |
|                             | mint virus 1                                         | (MV-1)                | [NC_006944]                     |
|                             | grapevine leafroll-associated virus 2                | (GLRaV-2)             | [NC_007448]                     |
|                             | strawberry chlorotic fleck associated virus          | (SCFaV)               | [NC_008366]                     |
|                             | raspberry mottle virus                               | (RMV)                 | [NC_008585]                     |
|                             | carrot yellow leaf virus                             | (CYLV)                | [NC_013007]                     |
|                             | rose leaf rosette-associated virus                   | (RLRaV)               | [NC_024906]                     |
|                             | tobacco virus 1                                      | (ToV-1)               | [NC_027712]                     |
|                             | carnation necrotic fleck virus                       | (CNFV)                | [NC_038419]                     |
|                             | Rehmania virus 1                                     | (ReV1)                | [NC_040572]                     |
| <b><i>Velarivirus</i></b>   | little cherry virus 1                                | (LChV-1)              | [NC_001836]                     |
|                             | grapevine leafroll-associated virus 7                | (GLRaV-7)             | [NC_016436]                     |
|                             | Areca palm velarivirus 1                             | (APV1)                | [NC_027121]                     |
|                             | Cordyline virus 1                                    | (CoV-1)               | [NC_038421]                     |
|                             | Cordyline Virus 2                                    | (CoV-2)               | [JQ599282]                      |
|                             | Cordyline virus 3                                    | (Cov-3)               | [JQ599283]                      |
|                             | Cordyline virus 4                                    | (CoV-4)               | [JQ599284]                      |
| <b><i>Crinivirus</i></b>    | lettuce infectious yellows virus                     | (LIYV)                | [NC_003618]                     |
|                             | sweet potato chlorotic stunt virus                   | (SPCSV)               | [NC_004124]                     |
|                             | cucurbit yellow stunting disorder virus              | (CYSDV)               | [NC_004810]                     |
|                             | beet pseudo-yellows virus                            | (BPYV)                | [NC_005210]                     |
|                             | strawberry pallidosis-associated virus               | (SpaV)                | [NC_005896]                     |
|                             | potato yellow vein virus                             | (PYVV)                | [NC_006063]                     |
|                             | blackberry yellow vein-associated virus              | (BYVBaV)              | [NC_006963]                     |
|                             | tomato chlorosis virus                               | (ToCV)                | [NC_007341]                     |
|                             | bean yellow disorder virus                           | (BnYDV)               | [NC_010561]                     |
|                             | lettuce chlorosis virus                              | (LCV)                 | [NC_012910]                     |
|                             | tomato infectious chlorosis virus                    | (TICV)                | [NC_013259]                     |
|                             | Diodia vein chlorosis virus                          | (DVCV)                | [NC_038787]                     |
| <b><i>Ampelovirus</i></b>   | tetterwort vein chlorosis virus                      | (TEVCVO)              | [NC_038789]                     |
|                             | pineapple mealybug wilt associated virus-2           | (PMWaV-2)             | [AF283103]                      |
|                             | pineapple mealybug wilt associated virus-3           | (PMWaV-3)             | [DQ399259]                      |
|                             | grapevine leafroll-associated virus 3                | (GLRaV-3)             | [NC_004667]                     |
|                             | little cherry virus 2                                | (LChV-2)              | [NC_005065]                     |
|                             | plum bark necrosis and stem pitting-associated virus | (PBNSPaV)             | [NC_009992]                     |
|                             | pineapple mealybug wilt-associated virus 1           | (PMWaV-1)             | [NC_010178]                     |
|                             | grapevine leafroll-associated virus 4                | (GVLraV-4)            | [NC_016416]                     |
|                             | grapevine leafroll associated virus 1                | (GLRaV-1)             | [NC_016509]                     |
|                             | blackberry vein banding associated virus             | (BVBaV)               | [NC_022072]                     |
| Unassigned                  | pineapple mealybug wilt associated virus-2           | (PMWaV-2)             | [AF283103]                      |
|                             | Actinidia virus 1                                    | (AcV-1)               | [KX857665]                      |
