# Supplementary material for: Novel Ampeloviruses Infecting Cassava in Central Africa and the South-West Indian Ocean Islands
Source: MDPI journal article supplement (doi:10.3390/v13061030), 2021-05-29
Supplement: s1 [file s1]

|                                       |                                                                                                                                         |              |
|---------------------------------------|-----------------------------------------------------------------------------------------------------------------------------------------|--------------|
| Meav-1_RE-LJV-D-RNA1<br>D-RNA1_Sanger | ACATGCAATTCGATTTTGC GGTGGCCTTGGATCCTCTACATCTAAATGCTAACGAACGAA<br>-----AATGCTAACGAACGAA<br>*****                                         | 11813<br>61  |
| Meav-1_RE-LJV-D-RNA1<br>D-RNA1_Sanger | GAGCTTTGACTTCATTGTTAGCTAGATTTAGAACAGGAGAACACCTGTCAGAGGGCAAG<br>GAGCTTTGACTTCATTGTTAGCTAGATTTAGAACAGGAGAACACCTGTCAGAGGGCAAG<br>*****     | 11873<br>121 |
| Meav-1_RE-LJV-D-RNA1<br>D-RNA1_Sanger | CCTTAGGACAACGTGCTAGCAATCCACTAGATGATGTGGTTGAATCTATAGTTCCAGCGA<br>CCTTAGGACAACGTGCTAGCAATCCACTAGATGATGTGGTTGAATCTATAGTTCCAGCGA<br>*****   | 11933<br>181 |
| Meav-1_RE-LJV-D-RNA1<br>D-RNA1_Sanger | CTTCTCGAGGAATGTTACGAGAGTTGACTGGCGGTGCCAGTACGCTTGGGTATAATAGAA<br>CTTCTCGAGGAATGTTACGAGAGTTGACTGGCGGTGCCAGTACGCTTGGGTATAATAGAA<br>*****   | 11993<br>241 |
| Meav-1_RE-LJV-D-RNA1<br>D-RNA1_Sanger | GAAGACGCTACTAATTCAGCACCATGGCAACACCAACACCTGGAACACCAAACCTCTACTC<br>GAAGACGCTACTAATTCAGCACCATGGCAACACCAACACCTGGAACACCAAACCTCTACTC<br>***** | 12053<br>301 |
| Meav-1_RE-LJV-D-RNA1<br>D-RNA1_Sanger | CTCCTGATGCAAACAGTACTAATACCAACAGTCAAGTTGTGGCTGCTGTCGTACCTGGAG<br>CTCCTGATGCAAACAGTACTAATACCAACAGTCAAGTTGTGGCTGCTGTCGTACCTGGAG<br>*****   | 12113<br>361 |
| Meav-1_RE-LJV-D-RNA1<br>D-RNA1_Sanger | GTCGTCAGACCGTTGDELETIONZONEAATAAACAAGAGTAGCACAAGTCGGTCCAACCC<br>GTCGTCAGACCGTTG-----AATAAACAAGAGTAGCACAAGTCGGTCCAACCC<br>*****          | 12173<br>409 |
| Meav-1_RE-LJV-D-RNA1<br>D-RNA1_Sanger | TCACAATATGTACGAAGATTCTGGCGTTGCTCCAGAAATTTTCATGGGAGGACGACGTTG<br>TCACAATATGTACGAAGATTCTGGCGTTG-----<br>*****                             | 12229<br>465 |

**Figure S1:** Multiple sequence alignment of D-RNA1 clone (referred to in the figure as D-RNA1\_Sanger) with the defective reference from HTS (MEaV-1\_RE-LJV-D-RNA-1). The term “DELETIONZONE” has been inserted into the HTS defective reference to identify the zone where the deletion is located. This zone consists in 568 nucleotide sequences and is indicated by the rectangle.

|                                       |                                                                                                                                       |             |
|---------------------------------------|---------------------------------------------------------------------------------------------------------------------------------------|-------------|
| Meav-1_RE-LJV-D-RNA2<br>D-RNA2_Sanger | GAAGGAGCGTGCAGTAAACTCTAATGCGTGAAAAATGGGTGTCTTTCAATGACATTACT<br>-----                                                                  | 8400<br>7   |
| Meav-1_RE-LJV-D-RNA2<br>D-RNA2_Sanger | CAGGCTTTCGACAGTGAAGAAGTGTGTTCGCTAGCCGCGTTGTGTGAGGAGAAATAC<br>-----TTCGACAGTGAAGAAGTGTGTTCGCTAGCCGCGTTGTGTGAGGAGAAATAC<br>*****        | 8460<br>67  |
| Meav-1_RE-LJV-D-RNA2<br>D-RNA2_Sanger | GGTCCTAGTCCGTGGTGGTACGCTGCGATAGCGACAATTCATTGTATCAGGGCCAATCCG<br>GGTCCTAGTCCGTGGTGGTACGCTGCGATAGCGACAATTCATTGTATCAGGGCCAATCCG<br>***** | 8520<br>127 |
| Meav-1_RE-LJV-D-RNA2<br>D-RNA2_Sanger | CAGCAATTTGAGAGGTGTTGGAGTGAATATCTTCTCCTAGTATAAATGAAGCAAAGAAG<br>CAGCAATTTGAGAGGTGTTGGAGTGAATATCTTCTCCTAGTATAAATGAAGCAAAGAAG<br>*****   | 8580<br>187 |
| Meav-1_RE-LJV-D-RNA2<br>D-RNA2_Sanger | AGAAGCAAGGTCGTCTCCGAAGGAGGACCTGCGAGTTGTACAAATGACCAATTTATATTT<br>AGAAGCAAGGTCGTCTCCGAAGGAGGACCTGCGAGTTGTACAAATGACCAATTTATATTT<br>***** | 8640<br>247 |
| Meav-1_RE-LJV-D-RNA2<br>D-RNA2_Sanger | TGATTTTAAGTGGGCTATAACCGTTTDELETIONZONEACCTACAATTATGATGAAATAA<br>TGATTTTAAGTGGGCTATAACCGTTT-----ACCTACAATTATGATGAAATAA<br>*****        | 8700<br>295 |
| Meav-1_RE-LJV-D-RNA2<br>D-RNA2_Sanger | AAACGACCATTGATAATGCTATCCTTCAGTATGGCTACGAAAACCCGTTCCGCAATTTCG<br>AAACGACCATTGATAATGCTATCCTTCAGTATGGCTAC-----<br>*****                  | 8760<br>337 |
| Meav-1_RE-LJV-D-RNA2<br>D-RNA2_Sanger | GGAGGAGTGCGACCAGTTTCATAATTCAAGCATTAGCAAATGGACTCATGGAACCCAATG<br>-----                                                                 | 8820<br>337 |

**Figure S2:** Multiple sequence alignment of D-RNA2 clone (referred to in the figure as D-RNA2\_Sanger) with the defective reference from HTS (MEaV-1\_RE-LJV-D-RNA-2). The term “DELETIONZONE” has been inserted into the HTS defective reference to identify the zone where the deletion is located. This zone consists in 3761 nucleotide sequences and is indicated by the rectangle.

|                      |                                                               |      |
|----------------------|---------------------------------------------------------------|------|
| Meav-2_RE-LJV-D-RNA3 | CATTCCACTCCGTACTTCTGTTCTGAAGTTCCTGGTGGAAGCCGCTGGTAAACTACATTAC | 8460 |
| D_RNA3a-Sanger       | -----ACTACATTAC                                               | 10   |
| D_RNA3b-Sanger       | -----ACTACATTAC                                               | 10   |
|                      | *****                                                         |      |
| Meav-2_RE-LJV-D-RNA3 | GTACCCGACCCCTTCAAATTTTTATAAAATTTGGAGCGGAAGGTGCACCGACAAAGCCA   | 8520 |
| D_RNA3a-Sanger       | GTACCCGACCCCTTCAAATTTTTATAAAATTTGGAGCGGAAGGTGCACCGACAAAGCCA   | 70   |
| D_RNA3b-Sanger       | GTACCCGACCCCTTCAAATTTTTATAAAATTTGGAGCGGAAGGTGCACCGACAAAGCCA   | 70   |
|                      | *****                                                         |      |
| Meav-2_RE-LJV-D-RNA3 | TTATTTAAAGAGAAGTGGGCTTCATTTTACGACATAACAACCTGCTTATGACAGTGAGGAA | 8580 |
| D_RNA3a-Sanger       | TTATTTAAAGAGAAGTGGGCTTCATTTTACGACATAACAACCTGCTTATGACAGTGAGGAA | 130  |
| D_RNA3b-Sanger       | TTATTTAAAGAGAAGTGGGCTTCATTTTACGACATAACAACCTGCTTATGACAGTGAGGAA | 130  |
|                      | *****                                                         |      |
| Meav-2_RE-LJV-D-RNA3 | GTCTGCATCAAGTTGGCCCATCTATGCGCTGAGAAATACGGTGCATCGAATTGGTGGTAC  | 8640 |
| D_RNA3a-Sanger       | GTCTGCATCAAGTTGGCCCATCTATGCGCTGAGAAATACGGTGCATCGAATTGGTGGTAC  | 190  |
| D_RNA3b-Sanger       | GTCTGCATCAAGTTGGCCCATCTATGCGCTGAGAAATACGGTGCATCGAATTGGTGGTAC  | 190  |
|                      | *****                                                         |      |
| Meav-2_RE-LJV-D-RNA3 | GCTGCTATAGCTACAATCCATTGTATTCTGTGCAAACCAACACAATTTGCACGATGTTGG  | 8700 |
| D_RNA3a-Sanger       | GCTGCTATAGCTACAATCCATTGTATTCTGTGCAAACCAACACAATTTGCACGATGTTGG  | 250  |
| D_RNA3b-Sanger       | GCTGCTATAGCTACAATCCATTGTATTCTGTGCAAACCAACACAATTTGCACGATGTTGG  | 250  |
|                      | *****                                                         |      |
| Meav-2_RE-LJV-D-RNA3 | GAGACAGTTGATTGTGAGAGCATACGTTCTCGTAAGTCGDELETIONZONECAAACAAAC  | 8760 |
| D_RNA3a-Sanger       | GAGACAGTTGATTGTGAGAGCATACGTTCTCGTAAGTCG-----CAAACAAAC         | 298  |
| D_RNA3b-Sanger       | GAGACAGTTGATTGTGAGAGCATACGTTCTCGTAAGTCG-----CAAACAAAC         | 298  |
|                      | *****                                                         |      |
| Meav-2_RE-LJV-D-RNA3 | TAGTGTGGCAGTGGGGTGACAAAACCGTTACTACTACTTATAATAGTATTTCCGCTATGT  | 8820 |
| D_RNA3a-Sanger       | TAGTGTGGCAGTGGGGTGACAAAACCGTTACTACTACTTATAATAGTATTTCCGCTATGT  | 358  |
| D_RNA3b-Sanger       | TAGTGTGGCAGTGGGGTGACAAAACCGTTACTACTACTTATAATAGTATTTCCGCTATGT  | 358  |
|                      | *****                                                         |      |
| Meav-2_RE-LJV-D-RNA3 | TTGCGAAACATGGAGGTACTATTCCTAATATTGAACGTGCTTGGTGCAATCCACTAGCTT  | 8880 |
| D_RNA3a-Sanger       | TTGCGAAACATGGAGGTACTATTCCTAATATTGAACGTGCTTGGTGCAATCCACTAGCTT  | 406  |
| D_RNA3b-Sanger       | TTGCGAAACATGGAGGTACTATTCCTAATATTGAACGTGCTTGGTGCAATCCACTAGCTT  | 406  |
|                      | *****                                                         |      |

**Figure S3:** Multiple sequence alignment of D-RNA3 clones (two clones were sequenced and are referred to in the figure as D-RNA3a-Sanger and D-RNA3b-Sanger) with the defective reference from HTS (MEaV-2\_RE-LJV-D-RNA3). The term “DELETIONZONE” has been inserted into the reference HTS defective to identify the zone where the deletion has been identified. This zone consists in 648 nucleotide sequences and is indicated by the rectangle.

|                                         |                                                                                                                                         |             |
|-----------------------------------------|-----------------------------------------------------------------------------------------------------------------------------------------|-------------|
| Meav-2_MG-Mena-D-RNA-4<br>D-RNA4_Sanger | CGAGTGGCCACTGTGCATGAGTGTCAAGGGAAGACATATGAAAGAGTTGCATTGGTGCGA<br>-----                                                                   | 5100<br>0   |
| Meav-2_MG-Mena-D-RNA-4<br>D-RNA4_Sanger | ATCAAGCCCGCACAGACGAAGTCTTCACGAGCGCTCCACATAGATTAGTGGCTCTCACT<br>-----AGCCGCAAGACGAAGTCTTCACGAGCGCTCCACATAGATTAGTGGCTCTCACT<br>* ****     | 5160<br>53  |
| Meav-2_MG-Mena-D-RNA-4<br>D-RNA4_Sanger | CGACACACTACGAGTTTAGACTTCTATTGCATAAGAAATCGAATGGACCAGGGGATTGGT<br>CGACACACTACGAGTTTAGACTTCTATTGCATAAGAAATCGAATGGACCAGGGGATTGGT<br>*****   | 5220<br>113 |
| Meav-2_MG-Mena-D-RNA-4<br>D-RNA4_Sanger | CGAGATGTGCGAACTGATTGAGAAAATAACGGAACACGTCGCGAGGACTTTCTTAATTGAG<br>CGAGATGTGCGAACTGATTGAGAAAATAACGGAACACGTCGCGAGGACTTTCTTAATTGAG<br>***** | 5280<br>173 |
| Meav-2_MG-Mena-D-RNA-4<br>D-RNA4_Sanger | CAGTGTTCCTAACAATTATTACGTDELETIONZONETGATTTAGCAGAATGGACCATGTC<br>CAGTGTTCCTAACAATTATTACGT-----TGATTTAGCAGAATGGACCATGTC<br>*****          | 5340<br>221 |
| Meav-2_MG-Mena-D-RNA-4<br>D-RNA4_Sanger | CAGAACGACATCGGGTAAGGCAGGTTTGTACAAAAACTGCAAATACCTTCACTTCCCCA<br>CAGAACGACATCGGGTAAGGCAGGTTTGTACAAAAACTGCAAATACCTTCACTTCCCCA<br>*****     | 5400<br>281 |
| Meav-2_MG-Mena-D-RNA-4<br>D-RNA4_Sanger | TACTCAACTGGATGAATTCAAACCTATGGTGAAAGGGGATTTGAAACCAAACTAGATGA<br>TACTCAACTGGATGAATTCAAACCTATGGTGAAAGGGGATTTGAAACCAAACTAGATGA<br>*****     | 5460<br>341 |
| Meav-2_MG-Mena-D-RNA-4<br>D-RNA4_Sanger | CAC TTGCTTATCCGACATTCGAGTGGTCAAAATATAGTTTATCACGAACGAGCAGTTTG<br>CAC TTGCTTATCCGACATTCGAGTGGTCAAAATATAGTTTATCACGAACGAGCAGTTTG<br>*****   | 5520<br>401 |
| Meav-2_MG-Mena-D-RNA-4<br>D-RNA4_Sanger | TGCTTGTTTTCTGTCTGTTTCATCCAAATGACAAAAAGATTGAAAGCCATATTAAACAG<br>TGCTTGTTTTCTGTCTGTTTCATCCAAATGACAAAAAGATTGAAAGCCATATTAAACAG<br>*****     | 5580<br>461 |
| Meav-2_MG-Mena-D-RNA-4<br>D-RNA4_Sanger | ACGAGCGAAATTATTTGTAGGTGTAGACCTCTCTGAATTTGCTCTCGATATTCAGCTCAC<br>ACGAGCGAAATTATTTGTAGGTAA-----                                           | 5640<br>485 |

**Figure S4:** Multiple sequence alignment of D-RNA4 clone (referred to in the figure as D-RNA4-Sanger) with the defective reference from HTS (MEaV-2\_MG-Mena-D-RNA-4). The term “DELETIONZONE” has been inserted into the reference HTS defective to identify the zone where the deletion is located. This zone consists in 444 nucleotide sequences and is indicated by the rectangle.
