# Supplementary material for: Novel Ampeloviruses Infecting Cassava in Central Africa and the South-West Indian Ocean Islands
Source: Viruses. 2021 May 29;13(6):1030. doi: 10.3390/v13061030 (PMC8226816; doi:10.3390/v13061030)
Supplement: Supplementary file 1 [file viruses-13-01030-s001.zip]

Archive with 6 entries (6 files):
- Figure S1 & Figure S2 & Figure S3 & Figure S4.pdf
- Table S1.pdf
- Table S2.pdf
- Table S3.xlsx
- Table S4.xlsx
- Table S5.xlsx
