# Supplementary material for: Novel Ampeloviruses Infecting Cassava in Central Africa and the South-West Indian Ocean Islands
Source: Viruses. 2021 May 29;13(6):1030. doi: 10.3390/v13061030 (PMC8226816; doi:10.3390/v13061030)
Supplement: Supplementary file 1 [file viruses-13-01030-s001.zip › Table S3.xlsx]

## Sheet: Table S3
Table S3: Estimates of Evolutionary Divergence between amino acid (aa) Sequences for the HSP70h protein among cassava ampeloviruses isolates reported in this study
MG-Men-241
MY-6mb-4	0.0094518
RE-Ljv-x	0.0151229	0.0151229
CG-Kah	0.0246212	0.030303	0.030303
CG-Nmb	0.0302457	0.0283554	0.0283554	0.0340909
MY-Ren-5	0.123016	0.126984	0.126984	0.129225	0.121032
MG-Mia-403	0.117202	0.122873	0.122873	0.125	0.119093	0.00793651
MG-Men-9	0.323755	0.32567	0.323755	0.320537	0.32567	0.327968	0.32567
MG-Mia-362	0.331418	0.333333	0.331418	0.328215	0.333333	0.336016	0.331418	0.0171756
MG-Mia-10	0.32567	0.327586	0.32567	0.322457	0.327586	0.331992	0.327586	0.00954198	0.00763359
Mian-2-2	0.309751	0.311663	0.313576	0.302682	0.309751	0.315261	0.307839	0.133588	0.137405	0.131679
The number of amino acid differences per site from between sequences are shown. The analysis involved 11 amino acid sequences. All ambiguous positions were removed for each sequence pair. There were a total of 535 positions in the final dataset. Evolutionary analyses were conducted in MEGA X.
