# Supplementary material for: Novel Ampeloviruses Infecting Cassava in Central Africa and the South-West Indian Ocean Islands
Source: Viruses. 2021 May 29;13(6):1030. doi: 10.3390/v13061030 (PMC8226816; doi:10.3390/v13061030)
Supplement: Supplementary file 1 [file viruses-13-01030-s001.zip › Table S4.xlsx]

## Sheet: Table S4
Table S4: Estimates of Evolutionary Divergence between amino acid (aa) Sequences for the HSP70h protein among cassava ampeloviruses isolates reported in this study
MG-Men-241
MY-6mb-4	0.00956023
RE-Ljv-x	0.00934579	0.0114723
CG-Kah	0.0261682	0.0267686	0.0224299
CG-Nmb	0.0299065	0.0325048	0.0261682	0.0317757
MY-Ren-5	0.0990654	0.0975143	0.100935	0.100935	0.11028
MG-Mia-403	0.100935	0.0975143	0.102804	0.100935	0.11215	0.00747664
MG-Men-9	0.31028	0.305927	0.31028	0.31028	0.300935	0.302804	0.300935
MY-6mb-6	0.31028	0.305927	0.31028	0.31028	0.300935	0.306542	0.304673	0.011215
MG-Mia-362	0.308411	0.305927	0.308411	0.308411	0.299065	0.304673	0.302804	0.00934579	0.0130841
MG-Mia-10	0.308411	0.305927	0.308411	0.308411	0.299065	0.304673	0.302804	0.00934579	0.0130841	0
MY-Ren-8	0.316306	0.311871	0.316306	0.316306	0.306483	0.310413	0.308448	0.00982318	0.0117878	0.00982318	0.00982318
Mian-2-2	0.31028	0.305927	0.31215	0.31215	0.308411	0.308411	0.306542	0.0654206	0.0635514	0.0616822	0.0616822	0.0628684
The number of amino acid differences per site from between sequences are shown. The analysis involved 13 amino acid sequences. All ambiguous positions were removed for each sequence pair. There were a total of 535 positions in the final dataset. Evolutionary analyses were conducted in MEGAX.
