# Supplementary material for: Novel Ampeloviruses Infecting Cassava in Central Africa and the South-West Indian Ocean Islands
Source: Viruses. 2021 May 29;13(6):1030. doi: 10.3390/v13061030 (PMC8226816; doi:10.3390/v13061030)
Supplement: Supplementary file 1 [file viruses-13-01030-s001.zip › Table S5.xlsx]

## Sheet: Table S5
Table S5: Estimates of Evolutionary Divergence between amino acid (aa) Sequences for the coat protein among cassava ampeloviruses isolates reported in this study
MG-Men-241
MY-6mb-4	0.0321285
RE-Ljv-x	0.0194553	0.0321285
CG-Kah	0.0233463	0.0481928	0.0428016
CG-Nmb	0.0233463	0.0401606	0.0311284	0.0272374
MY-Ren-5	0.156863	0.165992	0.156863	0.164706	0.152941
MG-Men-9	0.187251	0.1893	0.183267	0.191235	0.179283	0.164659
MY-6mb-6	0.203187	0.205761	0.199203	0.207171	0.195219	0.184739	0.0358566
MG-Mia-362	0.191235	0.197531	0.187251	0.203187	0.191235	0.172691	0.0159363	0.0478088
MG-Mia-10	0.191235	0.193416	0.187251	0.195219	0.183267	0.168675	0.0119522	0.0478088	0.0278884
The number of amino acid differences per site from between sequences are shown. The analysis involved 10 amino acid sequences. All ambiguous positions were removed for each sequence pair. There were a total of 257 positions in the final dataset. Evolutionary analyses were conducted in MEGA X.
